# Supplementary material for: Ticagrelor Added to Aspirin in Acute Ischemic Stroke or Transient Ischemic Attack in Prevention of Disabling Stroke: A Randomized Clinical Trial
Source: PubMed Central journal article supplement — JAMA Neurol. 2020 Nov 7;78(2):1–9. doi: 10.1001/jamaneurol.2020.4396 (PMC7648910; doi:10.1001/jamaneurol.2020.4396), 2020-11-07

## Supplemental Online Content

Amarenco P, Denison H, Evans SR, et al; the THALES Steering Committee and Investigators. Ticagrelor added to aspirin in acute ischemic stroke or transient ischemic attack in prevention of disabling stroke: a randomized clinical trial. *JAMA Neurol*. Published online November 7, 2020. doi:10.1001/jamaneurol.2020.4396

**eFigure 1.** Flow diagram

**eTable 1.** mRS csore at day 30

**eTable 2.** Ordinal analysis of ischemic stroke

**eTable 3.** Baseline predictors of disabling stroke

**eFigure 2.** Primary outcome event with mRS >1 and mRS 0-1

**eFigure 3.** Recurrent stroke event with mRS >1, mRS>2, and mRS>3

This supplemental material has been provided by the authors to give readers additional information about their work.

eFigure 1. Flow Diagram of Study Participants

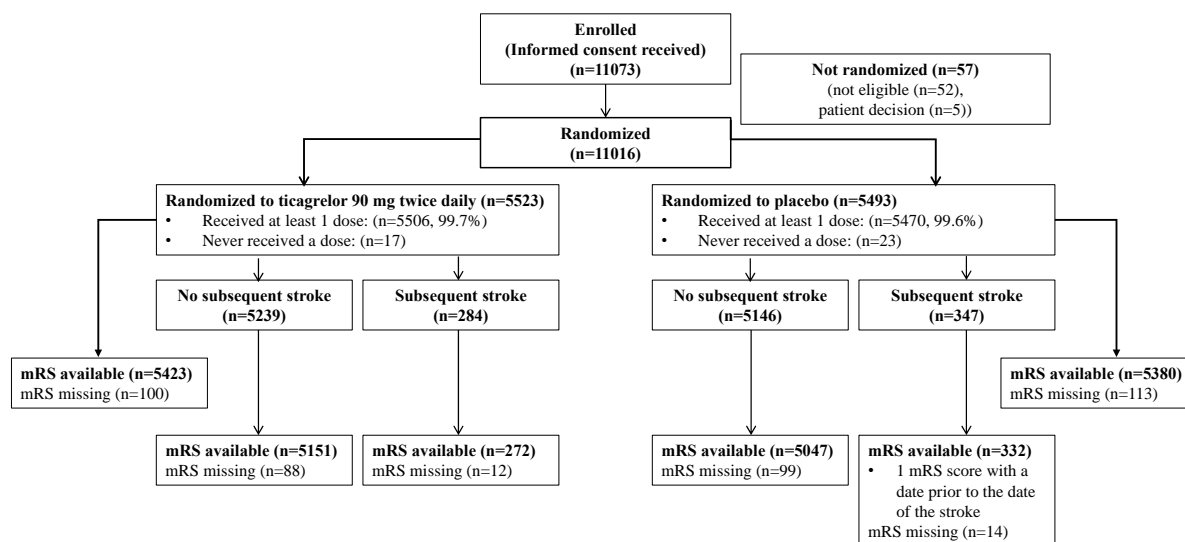

e Table 1. mRS score at day 30

|           |         | Ticagrelor<br>(N=5523) | Placebo<br>(N=5493) |
|-----------|---------|------------------------|---------------------|
| mRS score | 0       | 2020 (36.6%)           | 1964 (35.8%)        |
|           | 1       | 2116 (38.3%)           | 2126 (38.7%)        |
|           | 2       | 755 (13.7%)            | 755 (13.7%)         |
|           | 3       | 307 (5.6%)             | 302 (5.5%)          |
|           | 4       | 168 (3.0%)             | 182 (3.3%)          |
|           | 5       | 21 (0.4%)              | 24 (0.4%)           |
|           | 6       | 36 (0.7%)              | 27 (0.5%)           |
|           | Missing | 100 (1.8%)             | 113 (2.1%)          |

e Table 2. Ordinal analysis of ischemic stroke.

|                                      | Ticagrelor<br>(N=5523)      | Placebo<br>(N=5493)         |               |               |            |
|--------------------------------------|-----------------------------|-----------------------------|---------------|---------------|------------|
| Variable                             | Patients with<br>events (%) | Patients with<br>events (%) | Odds<br>ratio | 95%<br>CI     | P<br>value |
| No subsequent<br>ischemic stroke     | 5210 (95.2%)                | 5100 (93.9%)                | 0.77          | 0.65-<br>0.91 | 0.002      |
| Subsequent ischemic<br>stroke, mRS=0 | 15 (0.3%)                   | 15 (0.3%)                   |               |               |            |
| Subsequent ischemic<br>stroke, mRS=1 | 53 (1.0%)                   | 72 (1.3%)                   |               |               |            |
| Subsequent ischemic<br>stroke, mRS=2 | 51 (0.9%)                   | 57 (1.0%)                   |               |               |            |
| Subsequent ischemic<br>stroke, mRS=3 | 51 (0.9%)                   | 70 (1.3%)                   |               |               |            |
| Subsequent ischæmic<br>stroke, mRS=4 | 69 (1.3%)                   | 90 (1.7%)                   |               |               |            |
| Subsequent ischemic<br>stroke, mRS=5 | 13 (0.2%)                   | 16 (0.3%)                   |               |               |            |
| Subsequent ischemic<br>stroke, mRS=6 | 10 (0.2%)                   | 10 (0.2%)                   |               |               |            |

e Table 3. Baseline predictors of disabling stroke (stroke with mRS>1) or death (multivariable analysis)

| <b>Characteristics</b>                             | <b>OR (95% CI)</b> | <b>p-value</b> |
|----------------------------------------------------|--------------------|----------------|
| Index event: ischemic stroke NIHSS>3 vs TIA        | 3.98 (2.54,6.25)   | <.0001         |
| Ipsilateral stenosis $\geq$ 30%                    | 2.05 (1.68,2.50)   | <.0001         |
| Asian race                                         | 1.93 (1.55,2.41)   | <.0001         |
| Age (per 5 years)                                  | 1.10 (1.05,1.16)   | <.0001         |
| Systolic blood pressure (per 5 units)              | 1.06 (1.04,1.09)   | <.0001         |
| Diabetes                                           | 1.43 (1.17,1.75)   | 0.0005         |
| Dyslipidemia                                       | 0.81 (0.66-0.99)   | 0.0387         |
| Randomized to ticagrelor (vs placebo)              | 0.82 (0.68,0.99)   | 0.0429         |
| Index event: ischemic stroke NIHSS $\leq$ 3 vs TIA | 1.91 (1.22,3.00)   | 0.7545         |

e Figure 2. Number of patients with primary outcome event with mRS >1 and mRS 0-1 in ticagrelor and placebo groups

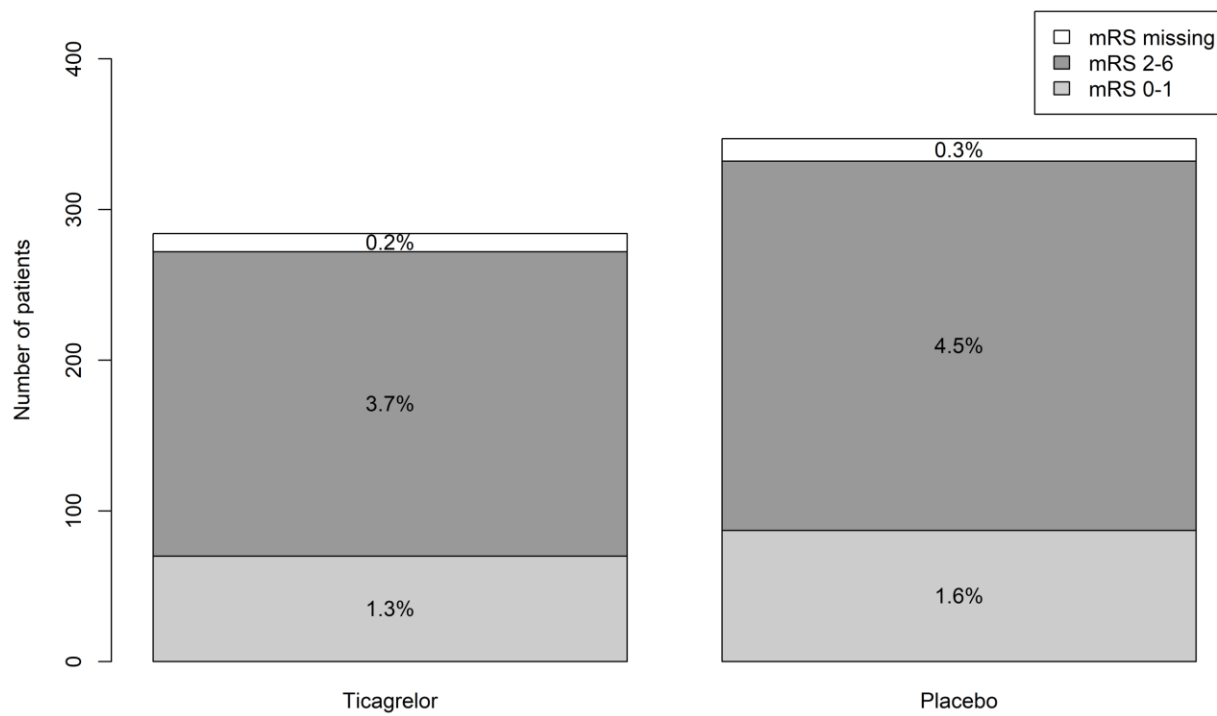

e Figure 3. Number of patients with recurrent stroke event with mRS >1, mRS>2, and mRS>3

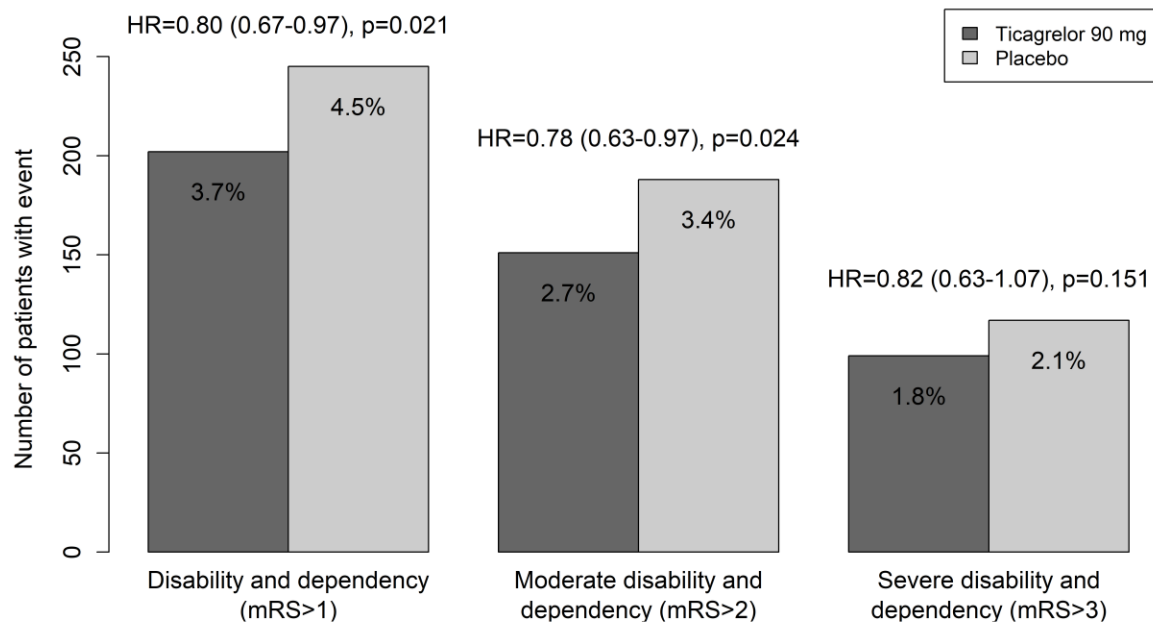

Supplement: jamaneurol-e204396-s002.pdf [file jamaneurol-e204396-s002.pdf]
