# Supplementary material for: Ticagrelor Added to Aspirin in Acute Ischemic Stroke or Transient Ischemic Attack in Prevention of Disabling Stroke: A Randomized Clinical Trial
Source: PubMed Central journal article supplement — JAMA Neurol. 2020 Nov 7;78(2):1–9. doi: 10.1001/jamaneurol.2020.4396 (PMC7648910; doi:10.1001/jamaneurol.2020.4396), 2020-11-07
Supplement: jamaneurol-e204396-s003.pdf [file jamaneurol-e204396-s003.pdf]

\*Indicates required information. Only first name, last name, and suffix will appear in PubMed.

| <b>Group Name(s):* THALES Steering Committee and Investigators</b> |                 |         |                  |                                                              |                                          |                                                         |                                          |                                  |
|--------------------------------------------------------------------|-----------------|---------|------------------|--------------------------------------------------------------|------------------------------------------|---------------------------------------------------------|------------------------------------------|----------------------------------|
| First Name, Middle Initial*                                        | Last Name*      | Suffix* | Academic Degrees | Institution                                                  | Location (city, state/province, country) | Role or Contribution, eg, chair, principal investigator | Group (for manuscripts with more than 1) | Subgroup, eg, Steering Committee |
| Sebastian                                                          | Ameriso         |         |                  | FLENI                                                        |                                          |                                                         |                                          |                                  |
| Leonardo                                                           | Gonzalez        |         |                  | Hospital General De Agudos "Ramos Mejia"                     |                                          |                                                         |                                          |                                  |
| Pablo                                                              | Ioli            |         |                  | Hospital Privado de la Comunidad                             |                                          |                                                         |                                          |                                  |
| Lorena                                                             | Jure            |         |                  | Sanatorio Parque S.A.                                        |                                          |                                                         |                                          |                                  |
| Guillermo                                                          | Povedano        |         |                  | Complejo Médico-Policia "Churruca-Visca"                     |                                          |                                                         |                                          |                                  |
| Guadalupe                                                          | Bruera          |         |                  | Hospital Privado de Rosario                                  |                                          |                                                         |                                          |                                  |
| Gustavo                                                            | Herrera         |         |                  | Hospital Privado Santa Clara de Asís                         |                                          |                                                         |                                          |                                  |
| Juan Jose                                                          | Martin Artesi   |         |                  | Sanatorio Allende Servicio de Neurologia                     |                                          |                                                         |                                          |                                  |
| Virginia A.                                                        | Pujol Lereis    |         |                  | Clinica IMA                                                  |                                          |                                                         |                                          |                                  |
| Conrado J                                                          | Estol           |         |                  | Sanatorio Güemes                                             |                                          |                                                         |                                          |                                  |
| Maia                                                               | Gomez Schneider |         |                  | Sanatorio de los Arcos                                       |                                          |                                                         |                                          |                                  |
| Santiago                                                           | Pigretti        |         |                  | Hospital Central de Mendoza                                  |                                          |                                                         |                                          |                                  |
| Fernando                                                           | Lipovestky      |         |                  | Hospital Universitario de la Universidad Abierta Interameric |                                          |                                                         |                                          |                                  |
| María Cristina                                                     | Zurru           |         |                  | Hospital Italiano                                            |                                          |                                                         |                                          |                                  |
| Stephen                                                            | Davis           |         |                  | Royal Melbourne Hospital                                     |                                          |                                                         |                                          |                                  |
| Andrew                                                             | Wong            |         |                  | Royal Brisbane and Women's Hospital                          |                                          |                                                         |                                          |                                  |
| Tissa                                                              | Wijeratne       |         |                  | Western Health                                               |                                          |                                                         |                                          |                                  |
| Arman                                                              | Sabet           |         |                  | Gold Coast University Hospital                               |                                          |                                                         |                                          |                                  |
| Andrew                                                             | Lee             |         |                  | Neuroscience Centre                                          |                                          |                                                         |                                          |                                  |
| Vincent                                                            | Thijs           |         |                  | Austin Health                                                |                                          |                                                         |                                          |                                  |
| Robin                                                              | Lemmens         |         |                  | UZ Leuven                                                    |                                          |                                                         |                                          |                                  |
| Laetitia                                                           | Yperzeele       |         |                  | Universitair Ziekenhuis Antwerpen                            |                                          |                                                         |                                          |                                  |
| Geert                                                              | Vanhooren       |         |                  | A.Z. Sint-Jan Brugge-Oostende AV                             |                                          |                                                         |                                          |                                  |
| Peter                                                              | Vanacker        |         |                  | AZ Groeninge                                                 |                                          |                                                         |                                          |                                  |
| Iris                                                               | Vansteenkiste   |         |                  | AZ Sint-Lucas Brugge                                         |                                          |                                                         |                                          |                                  |
| Vicky                                                              | Maqueda         |         |                  | AZ Sint-Lucas Brugge                                         |                                          |                                                         |                                          |                                  |
| André                                                              | Peeters         |         |                  | Cliniques universitaires Saint-Luc Centre de lutte contre la |                                          |                                                         |                                          |                                  |
| Marie-Christine                                                    | Hasenbroekx     |         |                  | AZ Delta                                                     |                                          |                                                         |                                          |                                  |
| Wendy                                                              | Van Daele       |         |                  | ZNA Middelheim                                               |                                          |                                                         |                                          |                                  |
| Adinda                                                             | De Pauw         |         |                  | AZ Sint-Blasius                                              |                                          |                                                         |                                          |                                  |
| Regilio                                                            | Oedit           |         |                  | AZ Sint-Blasius                                              |                                          |                                                         |                                          |                                  |
| Wouter                                                             | De Vooght       |         |                  | Sint-Trudo                                                   |                                          |                                                         |                                          |                                  |
| Philippe                                                           | Desfontaines    |         |                  | Centre Hospitalier Chrétien                                  |                                          |                                                         |                                          |                                  |
| Yves                                                               | Vandermeeren    |         |                  | CHU UCL Namur                                                |                                          |                                                         |                                          |                                  |
| Adinda                                                             | De Pauw         |         |                  | A.Z. Damiaan                                                 |                                          |                                                         |                                          |                                  |

## Supplemental Online Content: Nonauthor Collaborators

\*Indicates required information. Only first name, last name, and suffix will appear in PubMed.

| First Name, Middle Initial* | Last Name*  | Suffix* | Academic Degrees | Institution                                               | Location (city, state/province, country) | Role or Contribution, eg, chair, principal investigator | Group (for manuscripts with more than 1) | Subgroup, eg, Steering Committee |
|-----------------------------|-------------|---------|------------------|-----------------------------------------------------------|------------------------------------------|---------------------------------------------------------|------------------------------------------|----------------------------------|
| Marianna Deway Andrade      | Dracoulakis |         |                  | Hospital da Bahia                                         |                                          |                                                         |                                          |                                  |
| Rodrigo                     | Bazan       |         |                  | Universidade Estadual de Sao Paulo                        |                                          |                                                         |                                          |                                  |
| Octavio Marques             | Pontes Neto |         |                  | Hospital e Maternidade Sao Lucas de Ribeirao Preto        |                                          |                                                         |                                          |                                  |
| Daniel Da Cruz              | Bezerra     |         |                  | Hospital Pró-Cardíaco (PROCEP)                            |                                          |                                                         |                                          |                                  |
| Luiz Carlos                 | Marrone     |         |                  | Hospital Sao Lucas da PUCRS                               |                                          |                                                         |                                          |                                  |
| Pedro Andre                 | Kowacs      |         |                  | Instituto de Neurologia de Curitiba                       |                                          |                                                         |                                          |                                  |
| Carla Heloisa Cabral        | Moro        |         |                  | Clinica Neurologica E Neurocirurgica de Joinville Ltda    |                                          |                                                         |                                          |                                  |
| Paulo Cesar Otero           | Macelino    |         |                  | Parana Medical Research Center                            |                                          |                                                         |                                          |                                  |
| Marco Tulio Araujo          | Pedatella   |         |                  | Souza Prado Peixoto Ltda                                  |                                          |                                                         |                                          |                                  |
| Ekaterina                   | Titianova   |         |                  | Military Medical Academy-MHAT Sofia                       |                                          |                                                         |                                          |                                  |
| Ivan                        | Staikov     |         |                  | MHAT "Tokuda Hospital Sofia" AD, Neurology department     |                                          |                                                         |                                          |                                  |
| Dimitar                     | Maslarov    |         |                  | First MHAT AD, Neurology department                       |                                          |                                                         |                                          |                                  |
| Plamen                      | Petkov      |         |                  | MHAT "Sv. Pantaleymon - Pleven OOD", Neurology Department |                                          |                                                         |                                          |                                  |
| Tanya                       | Beleva      |         |                  | MHAT Hadzhi Dimitar                                       |                                          |                                                         |                                          |                                  |
| Borislav                    | Kralev      |         |                  | MHAT Sveti Ivan Rilski-2003 EOOD                          |                                          |                                                         |                                          |                                  |
| Nikolay                     | Sotirov     |         |                  | MHAT Pazardzhik AD                                        |                                          |                                                         |                                          |                                  |
| Dimcho                      | Hristov     |         |                  | MHAT "Teteven Dr Angel Peshev" EOOD                       |                                          |                                                         |                                          |                                  |
| Rumeliya Mitkova            | Ivanova     |         |                  | MHAT "Sveti Ivan Rilski" EOOD                             |                                          |                                                         |                                          |                                  |
| Margarita Velichkova        | Mihailova   |         |                  | MHAT Lukovit                                              |                                          |                                                         |                                          |                                  |
| Ashfaq M                    | Shuaib      |         |                  | University of Alberta Hospital                            |                                          |                                                         |                                          |                                  |
| Andrew                      | Demchuk     |         |                  | Foothills Hospital                                        |                                          |                                                         |                                          |                                  |
| Michel                      | Beaudry     |         |                  | CIUSSS du Saguenay-Lac-Saint-Jean                         |                                          |                                                         |                                          |                                  |
| Anthony R                   | Winder      |         |                  | Professional Bldg.                                        |                                          |                                                         |                                          |                                  |
| Sumiti                      | Nayar       |         |                  | Hamilton Health Sciences General Site                     |                                          |                                                         |                                          |                                  |
| Huaguang                    | Zheng       |         |                  | Beijing Tiantan Hospital,Capital Medical University       |                                          |                                                         |                                          |                                  |
| Shuya                       | Li          |         |                  | Beijing Tiantan Hospital,Capital Medical University       |                                          |                                                         |                                          |                                  |
| Xingquan                    | Zhao        |         |                  | Beijing Tiantan Hospital,Capital Medical University       |                                          |                                                         |                                          |                                  |
| Guoqiang                    | Wen         |         |                  | Hainan General Hospital                                   |                                          |                                                         |                                          |                                  |
| Xueshuang                   | Dong        |         |                  | Daqing Oilfield General Hospital                          |                                          |                                                         |                                          |                                  |

## Supplemental Online Content: Nonauthor Collaborators

\*Indicates required information. Only first name, last name, and suffix will appear in PubMed.

| First Name, Middle Initial* | Last Name* | Suffix* | Academic Degrees | Institution                                                  | Location (city, state/province, country) | Role or Contribution, eg, chair, principal investigator | Group (for manuscripts with more than 1) | Subgroup, eg, Steering Committee |
|-----------------------------|------------|---------|------------------|--------------------------------------------------------------|------------------------------------------|---------------------------------------------------------|------------------------------------------|----------------------------------|
| Guozhong                    | Li         |         |                  | The First Hospital of Haerbin Medical University             |                                          |                                                         |                                          |                                  |
| Zhaohui                     | Zhang      |         |                  | Renmin Hospital of Wuhan University                          |                                          |                                                         |                                          |                                  |
| Huisheng                    | Chen       |         |                  | The General Hospital of North War Zone of Chinese PLA        |                                          |                                                         |                                          |                                  |
| Dong                        | Wang       |         |                  | Baogang Hospital                                             |                                          |                                                         |                                          |                                  |
| Xiaohong                    | Li         |         |                  | Jinan Central Hospital                                       |                                          |                                                         |                                          |                                  |
| Yuncheng                    | Wu         |         |                  | Shanghai General Hospital                                    |                                          |                                                         |                                          |                                  |
| Xu                          | Zhang      |         |                  | The first Affiliated Hospital of Wenzhou Medical College     |                                          |                                                         |                                          |                                  |
| Baorong                     | Zhang      |         |                  | The Second Affiliated hospital of Zhejiang University school |                                          |                                                         |                                          |                                  |
| Wenke                       | Hong       |         |                  | HwaMei Hospital, University Of Chinese Academy Of Sciences   |                                          |                                                         |                                          |                                  |
| Xiaogang                    | Li         |         |                  | Peking University 3rd Hospital                               |                                          |                                                         |                                          |                                  |
| Lijuan                      | Wang       |         |                  | Guangdong General Hospital                                   |                                          |                                                         |                                          |                                  |
| Li                          | Liu        |         |                  | Chifeng Hospital                                             |                                          |                                                         |                                          |                                  |
| Xiaolin                     | Xu         |         |                  | Tianjin Huanhu Hospital                                      |                                          |                                                         |                                          |                                  |
| Peifu                       | Wang       |         |                  | Aerospace center hospital                                    |                                          |                                                         |                                          |                                  |
| Weihong                     | Zheng      |         |                  | Zhongshan Hospital of Xiamen University                      |                                          |                                                         |                                          |                                  |
| Jinsheng                    | Zeng       |         |                  | The 1st Affiliated Hosp. Of Sun Yat-Sen University           |                                          |                                                         |                                          |                                  |
| Yukai                       | Wang       |         |                  | Foshan 1st people hospital                                   |                                          |                                                         |                                          |                                  |
| Yan                         | Jia        |         |                  | Jilin people's Hospital                                      |                                          |                                                         |                                          |                                  |
| Yongqiu                     | Li         |         |                  | Tangshan Worker's Hospital                                   |                                          |                                                         |                                          |                                  |
| Bo                          | Hu         |         |                  | Wuhan Union Hospital                                         |                                          |                                                         |                                          |                                  |
| Wei                         | Shen       |         |                  | PuAi Hospital of Wuhan City                                  |                                          |                                                         |                                          |                                  |
| Zhi                         | Song       |         |                  | The Third Xiangya Hospital of Central South University       |                                          |                                                         |                                          |                                  |
| Zhiping                     | Hu         |         |                  | The Second Xiangya Hospital of Central South University      |                                          |                                                         |                                          |                                  |
| Yunhai                      | Liu        |         |                  | Xiangya Hospital of Central South University                 |                                          |                                                         |                                          |                                  |
| Kaifu                       | Ke         |         |                  | Affiliated Hospital of Nantong University                    |                                          |                                                         |                                          |                                  |
| Deqin                       | Geng       |         |                  | The Affiliated Hospital of Xuzhou Medical College            |                                          |                                                         |                                          |                                  |
| Shigang                     | Zhao       |         |                  | Inner Mongolia Medical College Affiliated Hospital           |                                          |                                                         |                                          |                                  |
| Runxiu                      | Zhu        |         |                  | Inner Mongolia People's Hospital                             |                                          |                                                         |                                          |                                  |

\*Indicates required information. Only first name, last name, and suffix will appear in PubMed.

| First Name, Middle Initial* | Last Name* | Suffix* | Academic Degrees | Institution                                                 | Location (city, state/province, country) | Role or Contribution, eg, chair, principal investigator | Group (for manuscripts with more than 1) | Subgroup, eg, Steering Committee |
|-----------------------------|------------|---------|------------------|-------------------------------------------------------------|------------------------------------------|---------------------------------------------------------|------------------------------------------|----------------------------------|
| Qiumin                      | Qu         |         |                  | First affiliated Hospital of Xian Jiaotong University       |                                          |                                                         |                                          |                                  |
| Xiuli                       | Zhao       |         |                  | Affiliated Hosptial of Qinghai University                   |                                          |                                                         |                                          |                                  |
| Qi                          | Wan        |         |                  | Jiangsu Province Hospital                                   |                                          |                                                         |                                          |                                  |
| Yunhua                      | Yue        |         |                  | Yangpu Hospital, Tongji University                          |                                          |                                                         |                                          |                                  |
| Huishan                     | Du         |         |                  | Beijing Luhe Hospital, Capital Medical University           |                                          |                                                         |                                          |                                  |
| Meiyun                      | Zhang      |         |                  | Tianjin People Hospital                                     |                                          |                                                         |                                          |                                  |
| Yan                         | Wang       |         |                  | Tangshan People's Hospital                                  |                                          |                                                         |                                          |                                  |
| Dongfang                    | Li         |         |                  | The second hospital of Shanxi Medical University            |                                          |                                                         |                                          |                                  |
| Dongyu                      | Wang       |         |                  | JinZhou center Hosptial                                     |                                          |                                                         |                                          |                                  |
| Yongqiang                   | Li         |         |                  | Baoji Center Hosptial                                       |                                          |                                                         |                                          |                                  |
| Xufang                      | Xie        |         |                  | Jiangxi Provincial People's Hospital                        |                                          |                                                         |                                          |                                  |
| Tingmin                     | Yu         |         |                  | 2nd hospital of Jilin University                            |                                          |                                                         |                                          |                                  |
| Qi                          | Liu        |         |                  | Affiliated Hospital of Guizhou Medical University           |                                          |                                                         |                                          |                                  |
| Mingxiu                     | Yang       |         |                  | Liuzhou General hospital                                    |                                          |                                                         |                                          |                                  |
| Xiaoping                    | Pan        |         |                  | Guangzhou First People's Hospital                           |                                          |                                                         |                                          |                                  |
| Lijun                       | Xu         |         |                  | The Second Affiliated Hospital of Nanchang University       |                                          |                                                         |                                          |                                  |
| Deen                        | Xu         |         |                  | Wuxi No.2 People's Hospital                                 |                                          |                                                         |                                          |                                  |
| Gang                        | Li         |         |                  | Shanghai Oriental Hospital                                  |                                          |                                                         |                                          |                                  |
| Anding                      | Xu         |         |                  | Guangzhou Overseas Chinese Hospital                         |                                          |                                                         |                                          |                                  |
| Martin                      | Roubec     |         |                  | Fakultni nemocnice Ostrava Poruba - Neurologicka klinika    |                                          |                                                         |                                          |                                  |
| Petr                        | Geier      |         |                  | Nemocnice Pardubice, neurologicke oddeleni                  |                                          |                                                         |                                          |                                  |
| Daniel                      | Vaclavik   |         |                  | Vitkovicka nemocnice, a.s. - neurologie                     |                                          |                                                         |                                          |                                  |
| Jiri                        | Neumann    |         |                  | Krajská zdravotní a.s. Nemocnice Chomutov                   |                                          |                                                         |                                          |                                  |
| Jana                        | Bednarova  |         |                  | Krajska zdravotni a.s., Masarykova nemocnice Usti nad Labem |                                          |                                                         |                                          |                                  |
| Robert                      | Mikulik    |         |                  | Fakulni nemocnice u Sv. Anny - Neurologicka klinika         |                                          |                                                         |                                          |                                  |
| David                       | Hlinovsky  |         |                  | Fakultni Thomayerova nemocnice s poliklinikou, neurologie   |                                          |                                                         |                                          |                                  |
| Pierre                      | Amarenco   |         |                  | Hôpital Bichat Claude bernard                               |                                          |                                                         |                                          |                                  |
| Charlotte                   | Cordonnier |         |                  | Hôpital Roger Salengro                                      |                                          |                                                         |                                          |                                  |
| Igor                        | Sibon      |         |                  | Groupe Hospitalier Pellegrin                                |                                          |                                                         |                                          |                                  |

## Supplemental Online Content: Nonauthor Collaborators

\*Indicates required information. Only first name, last name, and suffix will appear in PubMed.

| First Name, Middle Initial* | Last Name*      | Suffix* | Academic Degrees | Institution                                           | Location (city, state/province, country) | Role or Contribution, eg, chair, principal investigator | Group (for manuscripts with more than 1) | Subgroup, eg, Steering Committee |
|-----------------------------|-----------------|---------|------------------|-------------------------------------------------------|------------------------------------------|---------------------------------------------------------|------------------------------------------|----------------------------------|
| Caroline                    | Arquizan        |         |                  | Hôpital Gui de Chauliac                               |                                          |                                                         |                                          |                                  |
| Sonia                       | Alamowitch      |         |                  | Hopital St Antoine                                    |                                          |                                                         |                                          |                                  |
| Bertrand                    | Lapergue        |         |                  | Hopital Foch                                          |                                          |                                                         |                                          |                                  |
| Jean-Marc                   | Olivot          |         |                  | CHU de Toulouse - Hopital Purpan                      |                                          |                                                         |                                          |                                  |
| Nicolas                     | Raposo          |         |                  | CHU de Toulouse - Hopital Purpan                      |                                          |                                                         |                                          |                                  |
| Marie-Hélène                | Mahagne         |         |                  | Hôpital Pasteur                                       |                                          |                                                         |                                          |                                  |
| Emmanuel                    | Touze           |         |                  | CHU Côte de Nacre                                     |                                          |                                                         |                                          |                                  |
| Gilles                      | Rodier          |         |                  | Centre Hospitalier de la région d'Annecy              |                                          |                                                         |                                          |                                  |
| Stéphane                    | Vannier         |         |                  | CHU Rennes–Hopital Pontchaillou                       |                                          |                                                         |                                          |                                  |
| Yves                        | Samson          |         |                  | Groupe Hospitalier Pitié-Salpêtrière                  |                                          |                                                         |                                          |                                  |
| Michael                     | Obadia          |         |                  | Fondation Rothschild                                  |                                          |                                                         |                                          |                                  |
| Emmanuel                    | Ellie           |         |                  | Centre Hospitalier de la Côte Basque                  |                                          |                                                         |                                          |                                  |
| Benoît                      | Guillon         |         |                  | Hôpital Guillaume et René Laennec                     |                                          |                                                         |                                          |                                  |
| Serge                       | Timsit          |         |                  | CHU - Hôpital la Cavale Blanche                       |                                          |                                                         |                                          |                                  |
| Yannick                     | Bejot           |         |                  | Hôpital du Bocage                                     |                                          |                                                         |                                          |                                  |
| Valérie                     | Wolff           |         |                  | Hôpital Hautepierre                                   |                                          |                                                         |                                          |                                  |
| Didier                      | Smadja          |         |                  | Centre Hospitalier Sud Francilien                     |                                          |                                                         |                                          |                                  |
| Aude                        | Bagan-Triquenot |         |                  | CHU de Rouen - Hôpital Charles Nicolle                |                                          |                                                         |                                          |                                  |
| Pierre                      | Garnier         |         |                  | CHU Saint Etienne - Hôpital Nord                      |                                          |                                                         |                                          |                                  |
| Xavier                      | Ducrocq         |         |                  | CHR Metz Thionville Hopital de Mercy                  |                                          |                                                         |                                          |                                  |
| Peggy                       | Reiner          |         |                  | Paris, Hopital Lariboisiere, Service de Medecine B    |                                          |                                                         |                                          |                                  |
| Thierry                     | Moulin          |         |                  | Hôpital Jean Minjoz                                   |                                          |                                                         |                                          |                                  |
| Frédéric                    | Philippeau      |         |                  | Centre Hospitalier Fleyriat                           |                                          |                                                         |                                          |                                  |
| Fernando                    | Pico            |         |                  | Hôpital André Mignot                                  |                                          |                                                         |                                          |                                  |
| Sébastien                   | Richard         |         |                  | Centre hospitalier régional et universitaire de Nancy |                                          |                                                         |                                          |                                  |
| Joachim                     | Röther          |         |                  | Asklepios Klinik Altona                               |                                          |                                                         |                                          |                                  |
| Jörg                        | Berrouschot     |         |                  | Klinikum Altenburger Land GmbH                        |                                          |                                                         |                                          |                                  |
| Hassan                      | Soda            |         |                  | RHÖN-KLINIKUM Campus Bad Neustadt                     |                                          |                                                         |                                          |                                  |
| Carsten                     | Pohlmann        |         |                  | Asklepios Klinik Barmbek                              |                                          |                                                         |                                          |                                  |
| Christoph                   | Terborg         |         |                  | Asklepios Klinik St. Georg                            |                                          |                                                         |                                          |                                  |
| Darius Günther              | Nabavi          |         |                  | Vivantes Netzwerk für Gesundheit GmbH                 |                                          |                                                         |                                          |                                  |
| Rainer                      | Dziewas         |         |                  | Universitätsklinikum Münster                          |                                          |                                                         |                                          |                                  |
| Martin                      | Köhrmann        |         |                  | Universitätsklinikum Essen (AÖR)                      |                                          |                                                         |                                          |                                  |
| Jörg                        | Glahn           |         |                  | Johannes Wesling Klinikum                             |                                          |                                                         |                                          |                                  |
| Lars                        | Marquardt       |         |                  | Allgemeines Krankenhaus Wandsbek                      |                                          |                                                         |                                          |                                  |

## Supplemental Online Content: Nonauthor Collaborators

\*Indicates required information. Only first name, last name, and suffix will appear in PubMed.

| First Name, Middle Initial* | Last Name*  | Suffix* | Academic Degrees | Institution                                           | Location (city, state/province, country) | Role or Contribution, eg, chair, principal investigator | Group (for manuscripts with more than 1) | Subgroup, eg, Steering Committee |
|-----------------------------|-------------|---------|------------------|-------------------------------------------------------|------------------------------------------|---------------------------------------------------------|------------------------------------------|----------------------------------|
| Bernd                       | Kallmünzer  |         |                  | Friedrich-Alexander-Universität Erlangen-Nürnberg     |                                          |                                                         |                                          |                                  |
| Karin                       | Weißborn    |         |                  | Medizinische Hochschule Hannover                      |                                          |                                                         |                                          |                                  |
| Lawrence KS                 | Wong        |         |                  | HK, Prince of Wales Hosp., Neurology                  |                                          |                                                         |                                          |                                  |
| Yannie Oi-Yan               | Soo         |         |                  | HK, Prince of Wales Hosp., Neurology                  |                                          |                                                         |                                          |                                  |
| Richard                     | Li          |         |                  | Pamela Youde Nethersole Eastern Hospital              |                                          |                                                         |                                          |                                  |
| Wing Chi                    | Fong        |         |                  | Queen Elizabeth Hospital                              |                                          |                                                         |                                          |                                  |
| Siu Hung                    | Li          |         |                  | North District Hospital                               |                                          |                                                         |                                          |                                  |
| Raymond                     | Cheung      |         |                  | HK, Queen Mary Hosp., Neurology                       |                                          |                                                         |                                          |                                  |
| Kin Keung                   | Yip         |         |                  | Ruttonjee Hospital                                    |                                          |                                                         |                                          |                                  |
| Joshua Wai Ming             | Fok         |         |                  | Yan Chai Hospital                                     |                                          |                                                         |                                          |                                  |
| Michael Yat Pang            | Fu          |         |                  | HK, Tuen Mun Hosp., Medicine                          |                                          |                                                         |                                          |                                  |
| Norbert                     | Szegedi     |         |                  | Állami Egészségügyi Központ                           |                                          |                                                         |                                          |                                  |
| Krisztián                   | Pozsegovits |         |                  | Dr. Kenessey Albert Kórház és Rendelőintézet          |                                          |                                                         |                                          |                                  |
| Attila                      | Valikovics  |         |                  | BAZ Megyei Kórház -és Egyetemi Oktató Kórház          |                                          |                                                         |                                          |                                  |
| Gyula                       | Pánczél     |         |                  | Flór Ferenc Kh. Neuro                                 |                                          |                                                         |                                          |                                  |
| Csilla                      | Rózsa       |         |                  | Jahn Ferenc Dél-Pesti Kórház                          |                                          |                                                         |                                          |                                  |
| Péter                       | Diószeghy   |         |                  | Jósa András Kórház                                    |                                          |                                                         |                                          |                                  |
| Attila                      | Csányi      |         |                  | Petz Aladár Kórház                                    |                                          |                                                         |                                          |                                  |
| Levente                     | Kerényi     |         |                  | Fejér Megyei Szent György Kórház                      |                                          |                                                         |                                          |                                  |
| Valéria                     | Nagy        |         |                  | Kenézy Gyula Kórház-Rendelőintézet Eü. Nonprofit Kft. |                                          |                                                         |                                          |                                  |
| László                      | Szapáry     |         |                  | Pécsi Tudományegyetem                                 |                                          |                                                         |                                          |                                  |
| Dániel                      | Bereczki    |         |                  | Semmelweis Egyetem Neurológiai Klinika                |                                          |                                                         |                                          |                                  |
| Sándor                      | Molnár      |         |                  | Soproni Erzsébet Oktató Kórház                        |                                          |                                                         |                                          |                                  |
| Gyula                       | Timár       |         |                  | Bajai Szent Rókus Kórház                              |                                          |                                                         |                                          |                                  |
| András György               | Folyovich   |         |                  | Szent János Kórház és Észak-budai Egyesített Kórházak |                                          |                                                         |                                          |                                  |
| Mária                       | Sátori      |         |                  | Szent Borbála Kórház                                  |                                          |                                                         |                                          |                                  |
| Ildikó                      | Vastagh     |         |                  | Bajcsy-Zsilinszky Kórház- és Rendelőintézet           |                                          |                                                         |                                          |                                  |
| Praveen Kumar               | S           |         |                  | Victoria Hospital                                     |                                          |                                                         |                                          |                                  |
| Rajnish                     | Kumar       |         |                  | Paras Hospitals                                       |                                          |                                                         |                                          |                                  |
| Atul                        | Prasad      |         |                  | Dr. B.L. Kapur Memorial Hospital                      |                                          |                                                         |                                          |                                  |
| Vikram                      | Sharma      |         |                  | St. Theresa's Hospital                                |                                          |                                                         |                                          |                                  |
| Alok                        | Verma       |         |                  | Ganesh Shankar Vidyarthi Memorial Medical College     |                                          |                                                         |                                          |                                  |
| Indraneel                   | Basu        |         |                  | Popular Hospital                                      |                                          |                                                         |                                          |                                  |

## Supplemental Online Content: Nonauthor Collaborators

\*Indicates required information. Only first name, last name, and suffix will appear in PubMed.

| First Name, Middle Initial* | Last Name*    | Suffix* | Academic Degrees | Institution                                                  | Location (city, state/province, country) | Role or Contribution, eg, chair, principal investigator | Group (for manuscripts with more than 1) | Subgroup, eg, Steering Committee |
|-----------------------------|---------------|---------|------------------|--------------------------------------------------------------|------------------------------------------|---------------------------------------------------------|------------------------------------------|----------------------------------|
| Abu Zafar                   | Ansari        |         |                  | Popular Hospital                                             |                                          |                                                         |                                          |                                  |
| Vijaya                      | Pamidimukkala |         |                  | Lalitha Super Specialty Hospital                             |                                          |                                                         |                                          |                                  |
| Raghavendra                 | B.S.          |         |                  | Omega Hospital                                               |                                          |                                                         |                                          |                                  |
| Vivek Diwakarrao            | Junewar       |         |                  | Ganga Care Hospital                                          |                                          |                                                         |                                          |                                  |
| Sumit                       | Singh         |         |                  | Artemis Hospitals                                            |                                          |                                                         |                                          |                                  |
| Advait Prakash              | Kulkarni      |         |                  | Sri Venkateshwara Hospital                                   |                                          |                                                         |                                          |                                  |
| Padma M V                   | Srivastava    |         |                  | All India Institute of Medical Sciences                      |                                          |                                                         |                                          |                                  |
| Pramod                      | K             |         |                  | Shetty's Hospital                                            |                                          |                                                         |                                          |                                  |
| Sanjay Ganpat               | Ramteke       |         |                  | Meditrina Institute of Medical Sciences                      |                                          |                                                         |                                          |                                  |
| Jaideep                     | Bansal        |         |                  | Maharaja Agrasen Hospital                                    |                                          |                                                         |                                          |                                  |
| Kewal                       | Krishan       |         |                  | Maharaja Agrasen Hospital                                    |                                          |                                                         |                                          |                                  |
| Hrishikesh                  | Kumar         |         |                  | Institute of Neurosciences                                   |                                          |                                                         |                                          |                                  |
| Priyanka Vikas              | Kashyap       |         |                  | SGRR Medical College                                         |                                          |                                                         |                                          |                                  |
| Ramakrishnan                | Tcr           |         |                  | KG Hospital                                                  |                                          |                                                         |                                          |                                  |
| Gopal Rao                   | Adrasetty     |         |                  | Rajiv Gandhi Institute of Medical Sciences & RIMS GGH        |                                          |                                                         |                                          |                                  |
| Amit                        | Yeole         |         |                  | Chopda Medicare & Research Centre Pvt.Ltd. Magnum Heart Inst |                                          |                                                         |                                          |                                  |
| Rahul Bhimrao               | Baviskar      |         |                  | Chopda Medicare & Research Centre Pvt.Ltd. Magnum Heart Inst |                                          |                                                         |                                          |                                  |
| Giancarlo                   | Agnelli       |         |                  | OSPEDALE S.MARIA DELLA MISERICORDIA                          |                                          |                                                         |                                          |                                  |
| Danilo                      | Toni          |         |                  | AZIENDA UNIVERSITARIA POLICLINICO UMBERTO I                  |                                          |                                                         |                                          |                                  |
| Stefano                     | Ricci         |         |                  | OSPEDALE DI CITTA' DI CASTELLO                               |                                          |                                                         |                                          |                                  |
| Stefano                     | Ricci         |         |                  | ospedale di Gubbio e Gualdo Tadino                           |                                          |                                                         |                                          |                                  |
| Rossana                     | Tassi         |         |                  | A.O.U. Senese - Policlinico S. Maria alle Scotte             |                                          |                                                         |                                          |                                  |
| Giuseppe                    | Micieli       |         |                  | Fondazione Istituto Neurologico "C. Mondino" - IRCCS Privato |                                          |                                                         |                                          |                                  |
| Michelangelo                | Mancuso       |         |                  | Azienda Ospedaliero Universitaria Pisana                     |                                          |                                                         |                                          |                                  |
| Giovanni                    | Orlandi       |         |                  | Presidio Ospedaliero Apuane                                  |                                          |                                                         |                                          |                                  |
| Alberto                     | Chiti         |         |                  | Presidio Ospedaliero Apuane                                  |                                          |                                                         |                                          |                                  |
| Marialuisa                  | Delodovici    |         |                  | A. O. OSPEDALE DI CIRCOLO E FONDAZIONE MACCHI                |                                          |                                                         |                                          |                                  |
| Federico                    | Carimati      |         |                  | A. O. OSPEDALE DI CIRCOLO E FONDAZIONE MACCHI                |                                          |                                                         |                                          |                                  |
| Alessandro                  | De Vito       |         |                  | AOU di Ferrara - Arcispedale Sant'Anna                       |                                          |                                                         |                                          |                                  |
| Francesco                   | Perini        |         |                  | OSPEDALE S. BORTOLO - AZ. ULSS N. 6 DI VICENZA               |                                          |                                                         |                                          |                                  |

## Supplemental Online Content: Nonauthor Collaborators

\*Indicates required information. Only first name, last name, and suffix will appear in PubMed.

| First Name, Middle Initial* | Last Name*         | Suffix* | Academic Degrees | Institution                                                  | Location (city, state/province, country) | Role or Contribution, eg, chair, principal investigator | Group (for manuscripts with more than 1) | Subgroup, eg, Steering Committee |
|-----------------------------|--------------------|---------|------------------|--------------------------------------------------------------|------------------------------------------|---------------------------------------------------------|------------------------------------------|----------------------------------|
| Cinzia                      | Finocchi           |         |                  | AZIENDA OSPEDALIERA S. MARTINO E CLINICA UNIVERSITARIA CONV. |                                          |                                                         |                                          |                                  |
| Tiziana                     | Tassinari          |         |                  | Azienda Ospedaliera "Ospedale Santa Corona"                  |                                          |                                                         |                                          |                                  |
| Massimo                     | Del Sette          |         |                  | OSPEDALI GALLIERA                                            |                                          |                                                         |                                          |                                  |
| Luisa                       | Roveri             |         |                  | OSPEDALE S. RAFFAELE - MILANO                                |                                          |                                                         |                                          |                                  |
| Andrea                      | Zini               |         |                  | OSPEDALE CIVILE - OSPEDALE S. AGOSTINO - ESTENSE             |                                          |                                                         |                                          |                                  |
| Guido                       | Bigliardi          |         |                  | OSPEDALE CIVILE - OSPEDALE S. AGOSTINO - ESTENSE             |                                          |                                                         |                                          |                                  |
| Francesca Romana            | Pezzella           |         |                  | AZIENDA OSPEDALIERA SAN CAMILLO - FORLANINI                  |                                          |                                                         |                                          |                                  |
| Letizia                     | Cupini             |         |                  | OSPEDALE SANT'EUGENIO                                        |                                          |                                                         |                                          |                                  |
| Alessandro                  | Adami              |         |                  | OSPEDALE SACRO CUORE                                         |                                          |                                                         |                                          |                                  |
| Giampaolo                   | Tomelleri          |         |                  | Ospedale Borgo Trento                                        |                                          |                                                         |                                          |                                  |
| Carla                       | Zanferrari         |         |                  | Ospedale di Vizzolo Predabissi                               |                                          |                                                         |                                          |                                  |
| Angel Antonio               | Araúz Góngora      |         |                  | Instituto Nacional de Neurología y Neurocirugía              |                                          |                                                         |                                          |                                  |
| Minerva                     | López Ruíz         |         |                  | Hospital General de México                                   |                                          |                                                         |                                          |                                  |
| Angelica                    | Ruíz Franco        |         |                  | Hospital Juarez de Mexico, O.D.                              |                                          |                                                         |                                          |                                  |
| José Omar Javier            | Chacon Romero      |         |                  | IMSS HGR No. 1 Dr. Carlos Mac Gregor Sanchez Navarro         |                                          |                                                         |                                          |                                  |
| Fernando                    | Cruz Castillo      |         |                  | Hospital General de Zona No.8                                |                                          |                                                         |                                          |                                  |
| Jose Luis                   | Ruiz-Sandoval      |         |                  | Hospital Civil de Guadalajara "Fray Antonio Alcalde"         |                                          |                                                         |                                          |                                  |
| Jesús Daniel                | López Tapia        |         |                  | Hospital General de Zona No. 17 IMSS                         |                                          |                                                         |                                          |                                  |
| Edgar Alejandro             | Castillo Vargas    |         |                  | Hospital General de Durango                                  |                                          |                                                         |                                          |                                  |
| Juan Fernando               | Gongora Rivera     |         |                  | Hospital Universitario Jose E. Gonzalez UANL                 |                                          |                                                         |                                          |                                  |
| Guillermo                   | Rivera Martinez    |         |                  | Hospital General de Tijuana                                  |                                          |                                                         |                                          |                                  |
| Jorge                       | Villarreal Careaga |         |                  | Hospital General de Culiacán                                 |                                          |                                                         |                                          |                                  |
| Nilton                      | Custodio           |         |                  | Clinica Internacional - Lima                                 |                                          |                                                         |                                          |                                  |
| Oscar G.                    | Pamo Reyna         |         |                  | Hospital Nacional Arzobispo Loayza                           |                                          |                                                         |                                          |                                  |
| Cesar A                     | Castañeda          |         |                  | Hospital Nacional Guillermo Almenara Irigoyen - ESSALUD      |                                          |                                                         |                                          |                                  |
| Edwin Javier                | Pretell            |         |                  | Hospital Alberto Sabogal Sologuren - ESSALUD                 |                                          |                                                         |                                          |                                  |



## Supplemental Online Content: Nonauthor Collaborators

\*Indicates required information. Only first name, last name, and suffix will appear in PubMed.

| First Name, Middle Initial* | Last Name*  | Suffix* | Academic Degrees | Institution                                                  | Location (city, state/province, country) | Role or Contribution, eg, chair, principal investigator | Group (for manuscripts with more than 1) | Subgroup, eg, Steering Committee |
|-----------------------------|-------------|---------|------------------|--------------------------------------------------------------|------------------------------------------|---------------------------------------------------------|------------------------------------------|----------------------------------|
| Nestor                      | Najar       |         |                  | Hospital Nacional Cayetano Heredia                           |                                          |                                                         |                                          |                                  |
| Julio Cesar                 | Perez       |         |                  | Hospital Dos de Mayo                                         |                                          |                                                         |                                          |                                  |
| Luisa                       | Cardoza     |         |                  | Centro de Investigación Clínica Belén                        |                                          |                                                         |                                          |                                  |
| Carlos                      | Chavez      |         |                  | Unidad de Investigacion, Hospital Nacional Daniel Alcides ca |                                          |                                                         |                                          |                                  |
| Maria                       | Reyes       |         |                  | Clinica SANNA Sanchez Ferrer                                 |                                          |                                                         |                                          |                                  |
| Anna                        | Członkowska |         |                  | Instytut Psychiatrii i Neurologii                            |                                          |                                                         |                                          |                                  |
| Waldemar                    | Fryze       |         |                  | Copernicus Podmiot Leczniczy Sp. z o.o. im M. Kopernika w Gd |                                          |                                                         |                                          |                                  |
| Piotr                       | Sobolewski  |         |                  | Szpital Specjalistyczny Ducha Świętego w Sandomierzu         |                                          |                                                         |                                          |                                  |
| Ryszard                     | Nowak       |         |                  | Szpital Specjalistyczny im L Rydygiera w Krakowie            |                                          |                                                         |                                          |                                  |
| Dorota                      | Szkopek     |         |                  | Mazowiecki Szpital Specjalistyczny im. Dr Józefa Psarskiego  |                                          |                                                         |                                          |                                  |
| Zbigniew                    | Bąk         |         |                  | Samodzielny Publiczny Wojewódzki Szpital Specjalistyczny     |                                          |                                                         |                                          |                                  |
| Sławomir                    | Brzozowski  |         |                  | SPZOZ w Gryficach Szpital MEDICAM                            |                                          |                                                         |                                          |                                  |
| Waldemar                    | Brola       |         |                  | Szpital Specjalistyczny Św. Łukasza w Końskich               |                                          |                                                         |                                          |                                  |
| Marek                       | Zalisz      |         |                  | Samodzielny Publiczny Zakład Opieki Zdrowotnej w Działdowie  |                                          |                                                         |                                          |                                  |
| Konrad                      | Rejdak      |         |                  | Samodzielny Publiczny Szpital Kliniczny Nr 4 w Lublinie      |                                          |                                                         |                                          |                                  |
| Marta                       | Bilik       |         |                  | Samodzielny Publiczny Specjalistyczny Szpital Zachodni       |                                          |                                                         |                                          |                                  |
| Małgorzata                  | Fudala      |         |                  | SPZOZ Szpital Powiatowy im. Marii Skłodowskiej-Curie         |                                          |                                                         |                                          |                                  |
| Andrzej                     | Tutaj       |         |                  | Wojewodzki Szpital Specjalistyczny                           |                                          |                                                         |                                          |                                  |
| Anetta                      | Lasek-Bal   |         |                  | Samodzielny Publiczny Szpital Kliniczny nr 7 Śląskiego UM    |                                          |                                                         |                                          |                                  |
| Jan                         | Kochanowicz |         |                  | Uniwersytecki Szpital Kliniczny w Białymstoku                |                                          |                                                         |                                          |                                  |
| Bartosz                     | Karaszewski |         |                  | Uniwersyteckie Centrum Kliniczne                             |                                          |                                                         |                                          |                                  |
| Tomasz                      | Berkowicz   |         |                  | Miejskie Centrum Medyczne im. Dr Karola Jonschera w Łodzi    |                                          |                                                         |                                          |                                  |
| Beata                       | Zwiernik    |         |                  | Uniwersytecki Szpital Kliniczny w Olsztynie                  |                                          |                                                         |                                          |                                  |
| Dorota                      | Różański    |         |                  | Mazowiecki Szpital Bródnowski w Warszawie Sp. z o.o.         |                                          |                                                         |                                          |                                  |

## Supplemental Online Content: Nonauthor Collaborators

\*Indicates required information. Only first name, last name, and suffix will appear in PubMed.

| First Name, Middle Initial* | Last Name*   | Suffix* | Academic Degrees | Institution                                                  | Location (city, state/province, country) | Role or Contribution, eg, chair, principal investigator | Group (for manuscripts with more than 1) | Subgroup, eg, Steering Committee |
|-----------------------------|--------------|---------|------------------|--------------------------------------------------------------|------------------------------------------|---------------------------------------------------------|------------------------------------------|----------------------------------|
| Jan Paweł                   | Mejnartowicz |         |                  | Nowy Szpital w Świebodzinie                                  |                                          |                                                         |                                          |                                  |
| Szymon                      | Jurga        |         |                  | Szpital Uniwersytecki im Karola Marcinkowskiego w Zielonej G |                                          |                                                         |                                          |                                  |
| Jacek                       | Różniecki    |         |                  | SP ZOZ Uniwersytecki Szpital Kliniczny nr 1                  |                                          |                                                         |                                          |                                  |
| Maciej                      | Świat        |         |                  | SPZOZ Wojewodzki Szpital Specjalistyczny nr 3                |                                          |                                                         |                                          |                                  |
| Ovidiu Alexandru            | Bajenaru     |         |                  | Spitalul Universitar de Urgenta Bucuresti                    |                                          |                                                         |                                          |                                  |
| Cristina Aura               | Panea        |         |                  | Spitalul Universitar de Urgenta Elias                        |                                          |                                                         |                                          |                                  |
| Mihaela Adriana             | Simu         |         |                  | Spitalul Clinic Judetean De Urgenta Timisoara                |                                          |                                                         |                                          |                                  |
| Rodica                      | Balasa       |         |                  | Spitalul Clinic Judetean de Urgenta Tigiu-Mures              |                                          |                                                         |                                          |                                  |
| Dan Iulian                  | Cuciureanu   |         |                  | Spitalul Clinic de Urgenta "Prof. Dr. Nicolae Oblu"          |                                          |                                                         |                                          |                                  |
| Bogdan Ovidiu               | Popescu      |         |                  | Colentina Clinical Hospital                                  |                                          |                                                         |                                          |                                  |
| Monica                      | Sabau        |         |                  | Spitalul Clinic Judetean Oradea                              |                                          |                                                         |                                          |                                  |
| Corina                      | Roman-Filip  |         |                  | Spitalul Clinic Judetean Sibiu, Clinica Neurologie           |                                          |                                                         |                                          |                                  |
| Liudmila                    | Odnopozova   |         |                  | City clinical hospital # 9                                   |                                          |                                                         |                                          |                                  |
| Oleg                        | Artyukov     |         |                  | Moscow, City Hospital No. 64                                 |                                          |                                                         |                                          |                                  |
| Anna                        | Milto        |         |                  | Moscow, City Hospital No. 64                                 |                                          |                                                         |                                          |                                  |
| Liudmila Vitalievna         | Stakhovskaya |         |                  | Russian National Investigational Medical University          |                                          |                                                         |                                          |                                  |
| Sergei                      | Aksentiev    |         |                  | Ryazan Regional Hospital                                     |                                          |                                                         |                                          |                                  |
| Svetlana E                  | Chuprina     |         |                  | State Healthcare Institution, Voronezh Regional Hospital#1   |                                          |                                                         |                                          |                                  |
| Elena B                     | Kuznetsova   |         |                  | Saratov City Clinical Hospital №9                            |                                          |                                                         |                                          |                                  |
| Ilya I                      | Sholomov     |         |                  | Saratov City Clinical Hospital №9                            |                                          |                                                         |                                          |                                  |
| Alexander                   | Malygin      |         |                  | Yaroslavl State Med Acad Healthcare Inst Clin Hospital 8     |                                          |                                                         |                                          |                                  |
| Elena                       | Mordvintseva |         |                  | Novosibirsk Private Clinical Hospital "RZD-Medicina"         |                                          |                                                         |                                          |                                  |
| Rostislav Y                 | Nilk         |         |                  | City Hospital #38 n.a. N.A.Semashko                          |                                          |                                                         |                                          |                                  |
| Inna                        | Ershova      |         |                  | City Hospital #38 n.a. N.A.Semashko                          |                                          |                                                         |                                          |                                  |
| Dina                        | Khasanova    |         |                  | Kazan Interregional Clinical D                               |                                          |                                                         |                                          |                                  |
| Leila                       | Akhmadeeva   |         |                  | Bashkir State Medical university                             |                                          |                                                         |                                          |                                  |
| Aida                        | Iakupova     |         |                  | Kazan State Medical University                               |                                          |                                                         |                                          |                                  |
| Ekaterina A                 | Drozdova     |         |                  | City Hospital #13                                            |                                          |                                                         |                                          |                                  |
| Marine                      | Tanashyan    |         |                  | Institute of Neurology, Moscow                               |                                          |                                                         |                                          |                                  |

## Supplemental Online Content: Nonauthor Collaborators

\*Indicates required information. Only first name, last name, and suffix will appear in PubMed.

| First Name, Middle Initial* | Last Name*  | Suffix* | Academic Degrees | Institution                                                 | Location (city, state/province, country) | Role or Contribution, eg, chair, principal investigator | Group (for manuscripts with more than 1) | Subgroup, eg, Steering Committee |
|-----------------------------|-------------|---------|------------------|-------------------------------------------------------------|------------------------------------------|---------------------------------------------------------|------------------------------------------|----------------------------------|
| Evgenij                     | Pudov       |         |                  | City Clinical Hospital #5                                   |                                          |                                                         |                                          |                                  |
| Lybov A                     | Shpagina    |         |                  | City hospital №2                                            |                                          |                                                         |                                          |                                  |
| Svetlana                    | Berns       |         |                  | City Clinical Hospital #71 named after M.E. Zhadkevich      |                                          |                                                         |                                          |                                  |
| Liudmila G                  | Lenskaya    |         |                  | Tomsk Regional Clinical Hospital                            |                                          |                                                         |                                          |                                  |
| Konstantin                  | Golikov     |         |                  | St.Petersburg City Multiservice Hospital #2                 |                                          |                                                         |                                          |                                  |
| Andrey V                    | Kovalenko   |         |                  | SRI for complex studying of cardiovascular diseases         |                                          |                                                         |                                          |                                  |
| Elena                       | Vasilieva   |         |                  | City Clinical Hospital #23 n.a. Davydovsky                  |                                          |                                                         |                                          |                                  |
| Elena                       | Reznik      |         |                  | City Clinical Hospital named after VM Buyanova              |                                          |                                                         |                                          |                                  |
| Mikhail                     | Zykov       |         |                  | Sochi Municipal Healthcare Institution City Clinical Hosp#4 |                                          |                                                         |                                          |                                  |
| Evgeniy                     | Kovalchuk   |         |                  | St.Petersburg Dzhanelidze Research Inst for Emergency Care  |                                          |                                                         |                                          |                                  |
| Dmitry                      | Popov       |         |                  | Chelabinsk Regional Clinical Hospital #3                    |                                          |                                                         |                                          |                                  |
| Andrey                      | Belkin      |         |                  | Ekaterinburg Regional clinical hospital #1                  |                                          |                                                         |                                          |                                  |
| Olga                        | Androfagina |         |                  | SOCB n.a. V.D.Seredavin                                     |                                          |                                                         |                                          |                                  |
| Tatyana                     | Lokshanova  |         |                  | City Clinical Hospital #1 n.a. N.I. Pirogov                 |                                          |                                                         |                                          |                                  |
| Elena V                     | Melnikova   |         |                  | SPbGUZ "City Hospital #26"                                  |                                          |                                                         |                                          |                                  |
| Fahmi                       | Al-Senani   |         |                  | King Fahad Medical City                                     |                                          |                                                         |                                          |                                  |
| Nouf                        | Almansour   |         |                  | King Fahad Medical City                                     |                                          |                                                         |                                          |                                  |
| Fawaz                       | Alhussein   |         |                  | King Khalid University Hospital                             |                                          |                                                         |                                          |                                  |
| Ali                         | Alkhathaami |         |                  | King Abdul Aziz Medical City - Riyadh                       |                                          |                                                         |                                          |                                  |
| Saeed                       | Alghamdi    |         |                  | King Abdulaziz Medical City - Jeddah                        |                                          |                                                         |                                          |                                  |
| Miroslav                    | Brozman     |         |                  | Fakultna nemocnica Nitra                                    |                                          |                                                         |                                          |                                  |
| Marta                       | Mikloskova  |         |                  | Fakultna nemocnica Nitra                                    |                                          |                                                         |                                          |                                  |
| Georgi                      | Krastev     |         |                  | Fakultna nemocnica Trnava                                   |                                          |                                                         |                                          |                                  |
| Vlastimil                   | Serdahely   |         |                  | Neurologicke oddelenie                                      |                                          |                                                         |                                          |                                  |
| Michal                      | Kovacik     |         |                  | Neurologicke oddelenie                                      |                                          |                                                         |                                          |                                  |
| Ladislav                    | Gurcik      |         |                  | Vseobecna nemocnica s poliklinikou                          |                                          |                                                         |                                          |                                  |
| Miloslav                    | Dvorak      |         |                  | Nemocnica s poliklinikou,a.s.                               |                                          |                                                         |                                          |                                  |
| Egon                        | Kurca       |         |                  | Univerzitna nemocnica Martin                                |                                          |                                                         |                                          |                                  |
| Andrea                      | Cimprichova |         |                  | Neurologicke odd., FN Trencin                               |                                          |                                                         |                                          |                                  |
| Marian                      | Kycina      |         |                  | Neurologicke oddelenie NsP Dolny Kubin                      |                                          |                                                         |                                          |                                  |
| Erika                       | Zacharova   |         |                  | Vseobecna nemocnica Rimavska Sobota                         |                                          |                                                         |                                          |                                  |
| Richard                     | Risnovsky   |         |                  | Vseobecna nemocnica Ziar nad Hronom                         |                                          |                                                         |                                          |                                  |
| Hee-Joon                    | Bae         |         |                  | Seoul National University Bundang Hospital                  |                                          |                                                         |                                          |                                  |
| Kyung Bok                   | Lee         |         |                  | SoonChunHyang University Hospital Seoul                     |                                          |                                                         |                                          |                                  |

## Supplemental Online Content: Nonauthor Collaborators

\*Indicates required information. Only first name, last name, and suffix will appear in PubMed.

| First Name, Middle Initial* | Last Name*          | Suffix* | Academic Degrees | Institution                                     | Location (city, state/province, country) | Role or Contribution, eg, chair, principal investigator | Group (for manuscripts with more than 1) | Subgroup, eg, Steering Committee |
|-----------------------------|---------------------|---------|------------------|-------------------------------------------------|------------------------------------------|---------------------------------------------------------|------------------------------------------|----------------------------------|
| Yong-Jin                    | Cho                 |         |                  | Inje University Ilsan Paik Hospital             |                                          |                                                         |                                          |                                  |
| Jong-Moo                    | Park                |         |                  | Eulji Medical Center                            |                                          |                                                         |                                          |                                  |
| Joon-Tae                    | Kim                 |         |                  | Chonnam National University Hospital            |                                          |                                                         |                                          |                                  |
| Jun                         | Lee                 |         |                  | Yeungnam University Medical Center              |                                          |                                                         |                                          |                                  |
| Jae-Kwan                    | Cha                 |         |                  | Dong-A University Hospital                      |                                          |                                                         |                                          |                                  |
| Sung-Il                     | Sohn                |         |                  | Keimyung University Dongsan Medical Center      |                                          |                                                         |                                          |                                  |
| Dong-Ick                    | Shin                |         |                  | Chungbuk National University Hospital           |                                          |                                                         |                                          |                                  |
| Soo Joo                     | Lee                 |         |                  | Daejeon Eulji Medical Center                    |                                          |                                                         |                                          |                                  |
| Byung-Chul                  | Lee                 |         |                  | Hallym University Sacred Heart Hospital         |                                          |                                                         |                                          |                                  |
| Jay Chol                    | Choi                |         |                  | Jeju National University Hospital               |                                          |                                                         |                                          |                                  |
| Moo Seok                    | Park                |         |                  | Seoul Medical Center                            |                                          |                                                         |                                          |                                  |
| Dae-Il                      | Chang               |         |                  | KyungHee University Medical Center              |                                          |                                                         |                                          |                                  |
| Joung-Ho                    | Rha                 |         |                  | Inha University Hospital                        |                                          |                                                         |                                          |                                  |
| Sang Min                    | Sung                |         |                  | Pusan National University Hospital              |                                          |                                                         |                                          |                                  |
| Yangha                      | Hwang               |         |                  | Kyungpook National University Hospital          |                                          |                                                         |                                          |                                  |
| Carlos                      | Molina<br>Cateriano |         |                  | Hospital Vall d'Hebron                          |                                          |                                                         |                                          |                                  |
| Jaume                       | Roquer<br>González  |         |                  | Barcelona, H. del Mar, Neurologia               |                                          |                                                         |                                          |                                  |
| Jaime                       | Masjuan Vallejo     |         |                  | Hosp. Ramón y Cajal                             |                                          |                                                         |                                          |                                  |
| Meritxell                   | Gomis Cortina       |         |                  | Badalona,H.Germans Trias, Neurología            |                                          |                                                         |                                          |                                  |
| Francisco                   | Moniche Álvarez     |         |                  | Sevilla,H.V.Rocío,Neurología                    |                                          |                                                         |                                          |                                  |
| Miguel Ángel                | Gamero García       |         |                  | Hospital Virgen Macarena                        |                                          |                                                         |                                          |                                  |
| Soledad                     | Pérez Sánchez       |         |                  | Hospital Virgen Macarena                        |                                          |                                                         |                                          |                                  |
| Francisco                   | Purroy García       |         |                  | Hospital Universitario Arnau de Vilanova        |                                          |                                                         |                                          |                                  |
| Santiago                    | Trillo Senín        |         |                  | Madrid, H. La Princesa, Neurologia              |                                          |                                                         |                                          |                                  |
| Tomás                       | Segura Martín       |         |                  | Complejo Hospitalario Universitario de Albacete |                                          |                                                         |                                          |                                  |
| Joaquín                     | Serena Leal         |         |                  | Gerona,H.Josep Trueta,Neurología                |                                          |                                                         |                                          |                                  |
| Juan                        | Arenillas Lara      |         |                  | Hosp. Clínico de Valladolid                     |                                          |                                                         |                                          |                                  |
| Joan                        | Martí-Fàbregas      |         |                  | Barcelona,H.de la Sta. Creu y S.Pau,Neurología  |                                          |                                                         |                                          |                                  |
| Aida                        | Lago Martín         |         |                  | Valencia, H. La Fe, Neurologia                  |                                          |                                                         |                                          |                                  |
| Carlos                      | Tejero Juste        |         |                  | Zaragoza,H.Clin.Lozano Blesa,Neurología         |                                          |                                                         |                                          |                                  |
| Javier                      | Marta Moreno        |         |                  | Hospital Miguel Servet                          |                                          |                                                         |                                          |                                  |

## Supplemental Online Content: Nonauthor Collaborators

\*Indicates required information. Only first name, last name, and suffix will appear in PubMed.

| First Name, Middle Initial* | Last Name*      | Suffix* | Academic Degrees | Institution                                                 | Location (city, state/province, country) | Role or Contribution, eg, chair, principal investigator | Group (for manuscripts with more than 1) | Subgroup, eg, Steering Committee |
|-----------------------------|-----------------|---------|------------------|-------------------------------------------------------------|------------------------------------------|---------------------------------------------------------|------------------------------------------|----------------------------------|
| Nicolás                     | López Hernández |         |                  | Alicante,H.Gral.Univ.,Neurología                            |                                          |                                                         |                                          |                                  |
| Lars                        | Sjöblom         |         |                  | Akademiska sjukhuset, Strokeenheten                         |                                          |                                                         |                                          |                                  |
| Ann Charlotte               | Laska           |         |                  | Danderyds sjukhus AB, Strokeforskningsenheten               |                                          |                                                         |                                          |                                  |
| Margarita                   | Callander       |         |                  | Linköpings Universitetssjukhus                              |                                          |                                                         |                                          |                                  |
| Thomas                      | Moore           |         |                  | Ostersunds Hospital                                         |                                          |                                                         |                                          |                                  |
| Jan-Erik                    | Karlsson        |         |                  | Sahlgrenska Universitetssjukhus                             |                                          |                                                         |                                          |                                  |
| Mihaela Oana                | Romanitan       |         |                  | Södersjukhuset AB                                           |                                          |                                                         |                                          |                                  |
| Arne                        | Lindgren        |         |                  | Skånes Universitetssjukhus Lund                             |                                          |                                                         |                                          |                                  |
| Niaz                        | Ahmed           |         |                  | Karolinska Universitetssjukhuset Solna, Neurologkliniken    |                                          |                                                         |                                          |                                  |
| Björn                       | Cederin         |         |                  | Skaraborgs sjukhus Skövde                                   |                                          |                                                         |                                          |                                  |
| Christine                   | Kremer          |         |                  | Universitetssjukhuset MAS, Neurologmottagningen             |                                          |                                                         |                                          |                                  |
| Tsong-Hai                   | Lee             |         |                  | Chang-Gung Medical Foundation, Linkou, Neurology Department |                                          |                                                         |                                          |                                  |
| Jiann-Shing                 | Jeng            |         |                  | National Taiwan University Hospital                         |                                          |                                                         |                                          |                                  |
| Chih-Hung                   | Chen            |         |                  | National Cheng Kung University Hospital                     |                                          |                                                         |                                          |                                  |
| Helen L.                    | Po              |         |                  | Mackay Memorial Hospital-Taipei                             |                                          |                                                         |                                          |                                  |
| Chia-Wei                    | Liou            |         |                  | Kaohsiung Chang Gung Memorial Hospital                      |                                          |                                                         |                                          |                                  |
| Huey-Juan                   | Lin             |         |                  | Chi Mei Medical Center                                      |                                          |                                                         |                                          |                                  |
| Ruey-Tay                    | Lin             |         |                  | Kaohsiung Medical University Chung-Ho Memorial Hospital     |                                          |                                                         |                                          |                                  |
| Hsiu-Fen                    | Lin             |         |                  | Kaohsiung Medical University Chung-Ho Memorial Hospital     |                                          |                                                         |                                          |                                  |
| Li-Ming                     | Lien            |         |                  | Shin Kong Memorial Hospital                                 |                                          |                                                         |                                          |                                  |
| Lung                        | Chan            |         |                  | Taipei Medical University Shuang-Ho Hospital                |                                          |                                                         |                                          |                                  |
| Wei-Shih                    | Huang           |         |                  | China Medical University Hospital, Neurology Department     |                                          |                                                         |                                          |                                  |
| Wen-Yi                      | Huang           |         |                  | Chang-Gung Medical Foundation Keelung                       |                                          |                                                         |                                          |                                  |
| Ta-Cheng                    | Chen            |         |                  | Changhua Christian Hospital                                 |                                          |                                                         |                                          |                                  |
| Chin-I                      | Chen            |         |                  | Taipei Municipal Wan Fang Hospital                          |                                          |                                                         |                                          |                                  |
| Po-Lin                      | Chen            |         |                  | Veterans General Hospital Taichung                          |                                          |                                                         |                                          |                                  |
| Chun-Pai                    | Yang            |         |                  | Kuang Tien General Hospital-Dajia                           |                                          |                                                         |                                          |                                  |
| Yu                          | Sun             |         |                  | En Chu Kong Hospital                                        |                                          |                                                         |                                          |                                  |
| Aurauma                     | Chutinet        |         |                  | Division of Neurology, Department of Medicine               |                                          |                                                         |                                          |                                  |

## Supplemental Online Content: Nonauthor Collaborators

\*Indicates required information. Only first name, last name, and suffix will appear in PubMed.

| First Name, Middle Initial* | Last Name*           | Suffix* | Academic Degrees | Institution                                                      | Location (city, state/province, country) | Role or Contribution, eg, chair, principal investigator | Group (for manuscripts with more than 1) | Subgroup, eg, Steering Committee |
|-----------------------------|----------------------|---------|------------------|------------------------------------------------------------------|------------------------------------------|---------------------------------------------------------|------------------------------------------|----------------------------------|
| Tasanee                     | Tantirittisak        |         |                  | Prasat Neurological Institute                                    |                                          |                                                         |                                          |                                  |
| Sombat                      | Muengtaweepo<br>ngsa |         |                  | Thammasat University Hospital                                    |                                          |                                                         |                                          |                                  |
| Yongchai                    | Nilanont             |         |                  | Division of Neurology, Siriraj Hospital                          |                                          |                                                         |                                          |                                  |
| Somsak                      | Tiamkao              |         |                  | Srinagarind Hospital, Khon Kaen University                       |                                          |                                                         |                                          |                                  |
| Chesda                      | Udommongkol          |         |                  | Phramongkutklao Hospital                                         |                                          |                                                         |                                          |                                  |
| Witoon                      | Jantararotai         |         |                  | Chonburi Hospital                                                |                                          |                                                         |                                          |                                  |
| Tabtim                      | Chongsuivatwo<br>ng  |         |                  | Hat Yai Hospital                                                 |                                          |                                                         |                                          |                                  |
| Suwat                       | Srisuwananukor<br>n  |         |                  | BMA Medical College A Vajira Hospital                            |                                          |                                                         |                                          |                                  |
| Wasutha                     | Khaykhaew            |         |                  | Somdech PhraPinKlao Hospital                                     |                                          |                                                         |                                          |                                  |
| Supachai                    | Paiboonpol           |         |                  | Ratchaburi Hospital                                              |                                          |                                                         |                                          |                                  |
| Makorn                      | Limudomporn          |         |                  | Chaophya Abhaibhubejhr Hospital                                  |                                          |                                                         |                                          |                                  |
| Saengduan                   | Mayotarn             |         |                  | Bhumibol Adulyadej Hospital                                      |                                          |                                                         |                                          |                                  |
| Kanoksri                    | Samintharapany<br>a  |         |                  | Lampang Hospital                                                 |                                          |                                                         |                                          |                                  |
| Arkhom                      | Arayawichanon        |         |                  | Sappasittiprasong Hospital                                       |                                          |                                                         |                                          |                                  |
| Thanoot                     | Thamangraksat        |         |                  | Chiangrai Prachanukroh Hospital                                  |                                          |                                                         |                                          |                                  |
| Duangpol                    | Srimanee             |         |                  | Nakhonpathom Hospital                                            |                                          |                                                         |                                          |                                  |
| Galyna                      | Chmyr                |         |                  | Ivano-Frankivsk Regional Clinical Hospital-<br>Neurology         |                                          |                                                         |                                          |                                  |
| Nataliya                    | Tomakh               |         |                  | Municipal Institution "City Clinical Hospital #2"                |                                          |                                                         |                                          |                                  |
| Alla                        | Cherkez              |         |                  | MI Zaporizhzhya Reg Clinical Hospital-<br>Nephrology             |                                          |                                                         |                                          |                                  |
| Sergii                      | Moskovko             |         |                  | Reg Clin Psychourological Hospital Ushchenko -<br>Neurology dep  |                                          |                                                         |                                          |                                  |
| Vadym                       | Nikonov              |         |                  | MNPE"City CH for Emerg & Emerg Med Serv na<br>Meshchaninov" KCC  |                                          |                                                         |                                          |                                  |
| Svitlana                    | Shkrobot             |         |                  | Ternopil Reg Pub Clin Psychoneuroses Hospital-<br>Intensive Care |                                          |                                                         |                                          |                                  |
| Lyudmyla                    | Shulga               |         |                  | MI "Lutsk City Clinical Hospital" - Neurological                 |                                          |                                                         |                                          |                                  |
| Hanna                       | Hrebenuk             |         |                  | ME of Health Care "Kharkiv City Clinical<br>Hospital #7"         |                                          |                                                         |                                          |                                  |
| Valentyna                   | Yavorska             |         |                  | ME of Health Care "Kharkiv City Clinical<br>Hospital #7"         |                                          |                                                         |                                          |                                  |

## Supplemental Online Content: Nonauthor Collaborators

\*Indicates required information. Only first name, last name, and suffix will appear in PubMed.

| First Name, Middle Initial* | Last Name* | Suffix* | Academic Degrees | Institution                                              | Location (city, state/province, country) | Role or Contribution, eg, chair, principal investigator | Group (for manuscripts with more than 1) | Subgroup, eg, Steering Committee |
|-----------------------------|------------|---------|------------------|----------------------------------------------------------|------------------------------------------|---------------------------------------------------------|------------------------------------------|----------------------------------|
| Nataliia                    | Lytvynenko |         |                  | Poltava City Clinical Hospital#1 - Neurological dep      |                                          |                                                         |                                          |                                  |
| Marta                       | Khavunka   |         |                  | 5-th Lviv City Clinical Hospital                         |                                          |                                                         |                                          |                                  |
| Iryna                       | Kobets     |         |                  | Ivano-Frankivsk Reg Clin Cardio Center - Neurology dep   |                                          |                                                         |                                          |                                  |
| Nataliia                    | Chemer     |         |                  | MI of Kiyv RC,Kiyv Reg Clinical Hospital                 |                                          |                                                         |                                          |                                  |
| Ivanna                      | Tashchuk   |         |                  | Municipal Medical Insitution "City clinical hospital #3" |                                          |                                                         |                                          |                                  |
| Olha                        | Myronova   |         |                  | MI Kherson City Clinical Hospital n.a. E.E. Karabelesh   |                                          |                                                         |                                          |                                  |
| Thang Huy                   | Nguyen     |         |                  | 115 People's Hospital                                    |                                          |                                                         |                                          |                                  |
| Tan Van                     | Vo         |         |                  | Gia Dinh People's Hospital                               |                                          |                                                         |                                          |                                  |
| Thanh Trung                 | Tran       |         |                  | Nguyen Tri Phuong Hospital                               |                                          |                                                         |                                          |                                  |
| Nga Thi Phuong              | Nguyen     |         |                  | Thong Nhat Hospital                                      |                                          |                                                         |                                          |                                  |
| Anh Dat                     | Nguyen     |         |                  | Bach Mai Hospital                                        |                                          |                                                         |                                          |                                  |
| Binh Thanh                  | Nguyen     |         |                  | National Geriatric Hospital                              |                                          |                                                         |                                          |                                  |
| Thang Ba                    | Nguyen     |         |                  | UMC                                                      |                                          |                                                         |                                          |                                  |
| Ngoc Hoang                  | Nguyen     |         |                  | 108 Military Central Hospital                            |                                          |                                                         |                                          |                                  |
| Quang Dinh                  | Nguyen     |         |                  | Dong Nai General Hospital                                |                                          |                                                         |                                          |                                  |
| Nhan Duc                    | Le         |         |                  | Da Nang General Hospital                                 |                                          |                                                         |                                          |                                  |
| Dai Dinh                    | Pham       |         |                  | Military 103 hospital                                    |                                          |                                                         |                                          |                                  |
