# Supplementary material for: Ticagrelor Added to Aspirin in Acute Ischemic Stroke or Transient Ischemic Attack in Prevention of Disabling Stroke: A Randomized Clinical Trial
Source: PubMed Central journal article supplement — JAMA Neurol. 2020 Nov 7;78(2):1–9. doi: 10.1001/jamaneurol.2020.4396 (PMC7648910; doi:10.1001/jamaneurol.2020.4396), 2020-11-07
Supplement: jamaneurol-e204396-s004.pdf [file jamaneurol-e204396-s004.pdf]

## **Data Sharing Statement**

Amarenco. Ticagrelor Added to Aspirin in Acute Ischemic Stroke or Transient Ischemic Attack in Prevention of Disabling Stroke. *JAMA Neurol.* Published November 07, 2020. 10.1001/jamaneurol.2020.4396

### **Data**

**Data available:** No
